# Supplementary material for: Effects of Carbidopa Premedication on 18F-FDOPA PET Imaging of Glioma: A Multiparametric Analysis
Source: MDPI journal article supplement (doi:10.3390/cancers13215340), 2021-10-24
Supplement: s1 [file Supplementary_file_Cancers.pdf › Supplementary_file_Cancers.pdf]

**Supplemental Table S1.** Brain tumor radiomic parameters extracted from patients without and with carbidopa premedication and after normalizing for healthy brain parameters with Tumor to normal Brain Ratios (TBR).

| Parameters                                  | Without carbidopa premedication | With carbidopa premedication  | Correlation coefficient with SUV <sub>mean</sub> | p value | Delta mean value in % (absolute value) between patients without and with carbidopa premedication | Delta median value in % (absolute value) between patients without and with carbidopa premedication | TBR Without carbidopa premedication | TBR With carbidopa premedication | TBR p value |
|---------------------------------------------|---------------------------------|-------------------------------|--------------------------------------------------|---------|--------------------------------------------------------------------------------------------------|----------------------------------------------------------------------------------------------------|-------------------------------------|----------------------------------|-------------|
| <b>Morphological features (pyradiomics)</b> |                                 |                               |                                                  |         |                                                                                                  |                                                                                                    |                                     |                                  |             |
| Volume (mesh)                               | 19555.728<br>[3815.0;28696.7]   | 19904.328<br>[6750.8;24252.3] | 0.38                                             | 0.622   | +1.8% (348.6)                                                                                    | +26.0% (3964.4)                                                                                    | 8876.463<br>[3815.0;28696.7]        | 10713.917<br>[6750.8;24252.3]    | 0.622       |
| Volume (counting)                           | 19883.864<br>[4047.9;28696.7]   | 20247.182<br>[7064.8;24688.7] | 0.38                                             | 0.622   | +1.8% (363.3)                                                                                    | +25.6% (3962.0)                                                                                    | 9140.775<br>[4047.9;29061.2]        | 10991.843<br>[7064.8;24688.7]    | 0.622       |
| Surface area (mesh)                         | 4617.381<br>[1672.3;6606.9]     | 4817.326<br>[2465.1;5691.9]   | 0.35                                             | 0.634   | +4.2% (199.9)                                                                                    | +10.5% (414.9)                                                                                     | 2878.096<br>[1672.3;6606.9]         | 3266.035<br>[2465.1;5691.9]      | 0.634       |
| Surface to volume ratio                     | 0.399<br>[0.23;0.49]            | 0.341 [0.22;0.44]             | <b>-0.42</b>                                     | 0.969   | -17.1% (-0.05)                                                                                   | -2.4% (-0.007)                                                                                     | 0.413 [0.23;0.49]                   | 0.354 [0.22;0.44]                | 0.969       |
| Sphericity                                  | 0.706<br>[0.62;0.79]            | 0.682 [0.58;0.78]             | 0.05                                             | 0.746   | -3.5% (-0.02)                                                                                    | +3.5% (0.03)                                                                                       | 0.71 [0.62;0.79]                    | 0.715 [0.58;0.78]                | 0.746       |
| Maximum 3D diameter                         | 46.141<br>[29.7;59.3]           | 49.391<br>[41.86;55.21]       | 0.29                                             | 0.855   | +6.6% (3.2)                                                                                      | +2.4% (1.2)                                                                                        | 37.966 [29.73;59.35]                | 41.451 [41.86;55.21]             | 0.855       |
| Major axis length                           | 38.592<br>[24.4;50.4]           | 43.344<br>[33.65;50.28]       | 0.31                                             | 0.893   | +11.0% (4.8)                                                                                     | +11.9% (5.4)                                                                                       | 32.922 [24.43;50.38]                | 35.919 [33.65;50.28]             | 0.893       |
| Minor axis length                           | 27.998<br>[17.01;39.14]         | 31.613<br>[23.14;38.2]        | 0.38                                             | 0.900   | +11.4% (3.6)                                                                                     | +15.5% (4.9)                                                                                       | 24.136 [17.01;39.14]                | 27.193 [23.14;38.21]             | 0.900       |
| Least axis length                           | 21.013<br>[12.5;28.25]          | 21.936<br>[15.94;27.38]       | 0.37                                             | 0.587   | +4.2% (0.9)                                                                                      | +10.6% (2.3)                                                                                       | 17.363 [12.4;28.25]                 | 18.494 [15.93;27.38]             | 0.587       |

|                                                           |                      |                    |             |                   |                |                |                    |                     |       |
|-----------------------------------------------------------|----------------------|--------------------|-------------|-------------------|----------------|----------------|--------------------|---------------------|-------|
| Elongation                                                | 0.729<br>[0.63;0.86] | 0.738 [0.66;0.80]  | 0.20        | 0.789             | 1.3% (0.01)    | -6.1% (-0.04)  | 0.739 [0.63;0.86]  | 0.77 [0.66;0.80]    | 0.789 |
| Flatness                                                  | 0.55<br>[0.478;0.67] | 0.509 [0.46;0.60]  | 0.08        | 0.267             | -8.0% (-0.04)  | -7.6% (-0.04)  | 0.548 [0.48;0.67]  | 0.533 [0.46;0.60]   | 0.267 |
| <b>Local intensity features (in-house software)</b>       |                      |                    |             |                   |                |                |                    |                     |       |
| Local intensity peak                                      | 3.321<br>[1.97;4.14] | 4.732 [3.56;5.93]  | <b>0.86</b> | <b>0.040</b>      | +29.8% (1.4)   | +32.8% (1.4)   | 2.872 [1.78;3.48]  | 2.723 [1.95;3.31]   | 0.314 |
| Global intensity peak                                     | 3.406<br>[2.03;4.20] | 4.9 [3.61;6.13]    | <b>0.85</b> | <b>0.035</b>      | +30,5% (1.5)   | +33.6% (1.5)   | 2.942 [1.84;3.49]  | 2.811 [2.0;3.34]    | 0.339 |
| <b>Intensity-based statistical features (pyradiomics)</b> |                      |                    |             |                   |                |                |                    |                     |       |
| Mean intensity                                            | 2.394<br>[1.93;2.80] | 3.629 [3.14;4.05]  | <b>0.99</b> | <b>&lt; 0.001</b> | +34.0% (1.2)   | +34.9% (1.3)   | 2.418 [1.78;2.19]  | 2.327 [1.85;2.15]   | 0.450 |
| Intensity variance                                        | 0.365<br>[0.02;0.41] | 0.573 [0.10;0.86]  | <b>0.65</b> | 0.719             | +36.4% (0.2)   | +68.9% (0.2)   | 0.215 [0.02;0.31]  | 0.148 [0.04;0.28]   | 0.304 |
| Intensity skewness                                        | 0.995<br>[0.65;1.33] | 0.953 [0.79;1.10]  | 0.02        | 0.616             | -4.3% (-0.04)  | -9.2% (-0.08)  | 0.843 [0.65;1.33]  | 0.799 [0.79;1.10]   | 0.616 |
| (Excess) intensity kurtosis                               | 0.727 [-0.19;1.39]   | 0.336 [-0.13;0.51] | -0.03       | 0.311             | -116.6% (-0.4) | -101.9% (-0.3) | 0.182 [-0.19;1.39] | -0.057 [-0.13;0.51] | 0.311 |
| Median intensity                                          | 2.264<br>[1.90;2.55] | 3.467 [2.95;3.97]  | <b>0.98</b> | <b>&lt; 0.001</b> | +34.7% (1.2)   | +33.7% (1.2)   | 2.336 [1.75;2.05]  | 2.255 [1.80;2.08]   | 0.579 |
| Minimum intensity                                         | 1.877<br>[1.57;2.13] | 2.868 [2.44;3.35]  | <b>0.83</b> | <b>&lt; 0.001</b> | +34.5% (1.0)   | +33.4% (1.0)   | 1.955 [1.6;1.6002] | 1.897 [1.6;1.601]   | 0.847 |
| 10th intensity percentile                                 | 1.936<br>[1.69;2.20] | 2.955 [2.57;3.40]  | <b>0.86</b> | <b>&lt; 0.001</b> | +34.5% (1.0)   | +34.5% (1.0)   | 2.015 [1.63;1.68]  | 1.958 [1.63;1.68]   | 0.452 |
| 90th intensity percentile                                 | 3.074<br>[2.15;3.63] | 4.585 [6.39;5.44]  | <b>0.94</b> | <b>&lt; 0.001</b> | +33.0% (1.5)   | +38.5% (1.7)   | 2.957 [1.97;3.09]  | 2.822 [2.19;2.94]   | 0.406 |
| Maximum intensity                                         | 4.047<br>[2.55;5.11] | 5.745 [4.07;7.13]  | <b>0.84</b> | <b>0.032</b>      | +29.6% (1.7)   | +31.5% (0.4)   | 3.529 [2.14;4.26]  | 3.309 [2.42;4.06]   | 0.313 |
| Intensity interquartile range                             | 0.587<br>[0.22;0.79] | 0.884 [0.45;1.20]  | <b>0.67</b> | 0.297             | +33.6% (0.3)   | +46.5% (0.4)   | 0.535 [0.19;0.70]  | 0.475 [0.33;0.62]   | 0.498 |
| Intensity range                                           | 2.17<br>[0.68;3.40]  | 2.878 [1.36;4.24]  | <b>0.60</b> | 0.642             | +24.6% (0.7)   | +39.4% (1.0)   | 1.574 [0.54;2.65]  | 1.411 [0.82;2.46]   | 0.313 |
| Intensity mean absolute deviation                         | 0.364<br>[0.13;0.51] | 0.517 [0.26;0.74]  | <b>0.64</b> | 0.446             | +29.6% (0.2)   | +46.1% (0.2)   | 0.301 [0.11;0.45]  | 0.27 [0.17;0.41]    | 0.394 |
| Intensity-based robust mean absolute deviation            | 0.25<br>[0.09;0.34]  | 0.369 [0.19;0.50]  | <b>0.65</b> | 0.348             | +32.3% (0.1)   | +45.2% (0.1)   | 0.223 [0.08;0.30]  | 0.198 [0.12;0.27]   | 0.456 |

|                                                              |                             |                               |              |                   |                 |                     |                            |                             |           |
|--------------------------------------------------------------|-----------------------------|-------------------------------|--------------|-------------------|-----------------|---------------------|----------------------------|-----------------------------|-----------|
| Intensity-based energy                                       | 8077.473<br>[731.2;11772.4] | 16067.135<br>[2685.7;16389.0] | <b>0.68</b>  | 0.245             | +49.7% (7989.7) | +63.9%<br>(7785.5)  | 3987.985<br>[736.9;8000.3] | 4001.366<br>[1320.6;4923.3] | 0.60<br>2 |
| Root mean square intensity                                   | 2.455<br>[1.93;2.88]        | 3.701 [3.15;4.12]             | <b>0.99</b>  | <b>&lt; 0.001</b> | +33.7% (1.2)    | +36.7%<br>(1.4)     | 2.45 [1.78;2.29]           | 2.353 [1.87;2.21]           | 0.41<br>9 |
| <b>Intensity histogram features (pyradiomics)</b>            |                             |                               |              |                   |                 |                     |                            |                             |           |
| Discretized intensity entropy                                | 3.35<br>[2.44;4.19]         | 4.027 [3.38;4.77]             | <b>0.66</b>  | 0.293             | +16.8% (0.7)    | +20.7%<br>(0.9)     | 3.201 [2.17;3.90]          | 3.229 [2.69;3.85]           | 0.58<br>9 |
| Discretized intensity uniformity                             | 0.157<br>[0.07;0.21]        | 0.093 [0.05;0.11]             | <b>-0.69</b> | 0.274             | -68.3% (-0.06)  | -82.5% (-0.05)      | 0.164 [0.09;0.25]          | 0.151 [0.09;0.19]           | 0.67<br>2 |
| <b>Grey level co-occurrence based features (pyradiomics)</b> |                             |                               |              |                   |                 |                     |                            |                             |           |
| Joint maximum                                                | 0.071<br>[0.01;0.08]        | 0.033<br>[0.008;0.028]        | <b>-0.71</b> | 0.333             | -113.0% (-0.04) | -193.7%<br>(-0.02)  | 0.074 [0.02;0.10]          | 0.062 [0.02;0.07]           | 0.57<br>1 |
| Joint average                                                | 25.289<br>[20.14;29.95]     | 38.029<br>[32.5;42.4]         | <b>0.99</b>  | <b>&lt; 0.001</b> | +33.5 (12.7)    | +31.6<br>(20.5)     | 25.55 [18.68;23.62]        | 24.524 [19.70;23.01]        | 0.44<br>8 |
| Joint variance                                               | 38.384<br>[2.86;43.90]      | 59.455<br>[10.81;86.72]       | <b>0.64</b>  | 0.729             | +35.4% (21.1)   | +64.6%<br>(20.5)    | 22.296 [1.90;33.40]        | 15.298 [4.75;31.22]         | 0.29<br>3 |
| Joint entropy                                                | 6.614<br>[5.12;8.04]        | 7.964 [6.81;9.36]             | <b>0.69</b>  | 0.229             | +17.0% (1.3)    | +19.5%<br>(1.6)     | 6.402 [4.63;7.85]          | 6.435 [5.65;7.64]           | 0.59<br>8 |
| Difference average                                           | 2.749<br>[1.45;3.48]        | 4.098 [2.49;5.51]             | <b>0.70</b>  | 0.092             | +32.9% (1.3)    | +52.6%<br>(2.5)     | 2.777 [1.18;3.12]          | 2.511 [1.66;3.12]           | 0.51<br>3 |
| Difference variance                                          | 8.138<br>[1.50;9.56]        | 14.893<br>[4.46;22.25]        | <b>0.69</b>  | 0.207             | 45.4% (6.8)     | +67.4%<br>(8.8)     | 7.11 [0.99;8.11]           | 5.321 [2.06;7.53]           | 0.41<br>4 |
| Difference entropy                                           | 2.773<br>[2.19;3.34]        | 3.364 [2.88;3.94]             | <b>0.70</b>  | 0.122             | +17.6% (0.6)    | +25.0%<br>(0.9)     | 2.751 [1.94;3.20]          | 2.695 [2.37;3.19]           | 0.56<br>3 |
| Sum average                                                  | 50.578<br>[40.28;59.9]      | 76.057<br>[65.06;84.77]       | <b>0.99</b>  | <b>&lt; 0.001</b> | +33.5% (25.5)   | +35.3%<br>(27.2)    | 51.099 [37.37;47.25]       | 49.048 [39.40;46.02]        | 0.44<br>8 |
| Sum entropy                                                  | 4.297<br>[3.37;5.32]        | 5.042 [4.39;5.87]             | <b>0.66</b>  | 0.300             | +14.8% (0.7)    | +17.7%<br>(0.9)     | 4.14 [3.07;5.12]           | 4.16 [3.72;4.98]            | 0.60<br>3 |
| Angular second moment                                        | 0.038<br>[0.006;0.34]       | 0.014<br>[0.002;0.012]        | <b>-0.70</b> | 0.298             | -179.6% (-0.02) | -191.5%<br>(-0.009) | 0.039 [0.007;0.05]         | 0.032 [0.009;0.026]         | 0.57<br>0 |
| Contrast                                                     | 18.611<br>[3.59;22.89]      | 35.613<br>[10.7;52.9]         | <b>0.69</b>  | 0.135             | +47.7% (17.0)   | +74.5%<br>(26.5)    | 18.209 [2.38;17.66]        | 13.583 [4.83;17.29]         | 0.45<br>5 |
| Dissimilarity                                                | 2.749<br>[1.45;3.48]        | 4.098 [2.49;5.5]              | <b>0.70</b>  | 0.092             | +32.9% (1.3)    | +53.6%<br>(2.5)     | 2.777 [1.18;3.12]          | 2.511 [0.38;0.51]           | 0.51<br>3 |
| Inverse difference                                           | 0.447<br>[0.35;0.53]        | 0.354 [0.27;0.41]             | <b>-0.70</b> | 0.111             | -26.1% (-0.1)   | -45.6% (-0.1)       | 0.443 [0.38;0.57]          | 0.451 [0.38;0.51]           | 0.57<br>8 |

|                                                           |                            |                              |              |                   |                  |                  |                           |                           |       |
|-----------------------------------------------------------|----------------------------|------------------------------|--------------|-------------------|------------------|------------------|---------------------------|---------------------------|-------|
| Normalized inverse difference                             | 0.943 [0.93;0.96]          | 0.939 [0.93;0.94]            | -0.32        | 0.860             | -0.4% (-0.004)   | -0.06% (-0.005)  | 0.936 [0.93;0.96]         | 0.938 [0.93;0.94]         | 0.958 |
| Inverse difference moment                                 | 0.38 [0.26;0.47]           | 0.273 [0.18;0.33]            | <b>-0.71</b> | 0.120             | -39.0% (-0.1)    | -67.6% (-0.2)    | 0.374 [0.29;0.53]         | 0.382 [0.30;0.45]         | 0.612 |
| Normalized inverse difference moment                      | 0.993 [0.990;0.996]        | 0.992 [0.989;0.993]          | -0.34        | 0.911             | -0.1% (-0.001)   | -0.1% (-0.001)   | 0.991 [0.991;0.996]       | 0.992 [0.989;0.993]       | 0.976 |
| Inverse variance                                          | 0.347 [0.25;0.43]          | 0.265 [0.19;0.34]            | <b>-0.70</b> | 0.119             | -30.9% (-0.1)    | -63.2% (-0.1)    | 0.332 [0.28;0.45]         | 0.346 [0.29;0.36]         | 0.877 |
| Correlation                                               | 0.504 [0.26;0.75]          | 0.564 [0.44;0.72]            | 0.40         | 0.875             | +10.6% (0.1)     | -4.9% (-0.03)    | 0.436 [0.25;0.75]         | 0.475 [0.44;0.72]         | 0.859 |
| Autocorrelation                                           | 704.275 [414.9;909.0]      | 1546.75 [1060.3;1852.6]      | <b>0.99</b>  | <b>&lt; 0.001</b> | +54.5% (842.5)   | +59.8% (929.6)   | 742.051 [349.5;585.3]     | 651.082 [389.28;550.57]   | 0.400 |
| Cluster tendency                                          | 134.925 [7.1;153.6]        | 202.207 [32.4;304.5]         | <b>0.63</b>  | 0.832             | +33.3% (67.3)    | +68.3% (75.3)    | 70.975 [4.7;110.4]        | 47.609 [12.03;105.6]      | 0.280 |
| Cluster shade                                             | 3521.348 [6.4;1980.4]      | 3618.007 [99.9;5143.1]       | <b>0.59</b>  | 0.543             | +2.7% (96.7)     | +76.3% (696.5)   | 584.263 [6.04;1160.9]     | 269.613 [20.1;1097.3]     | 0.193 |
| Cluster prominence                                        | 291266.819 [131.5;8534.14] | 296546.876 [2738.9;288079.2] | <b>0.61</b>  | 0.497             | +1.8% (5280.1)   | +84.4% (31325.0) | 44147.941 [61.51;42900.1] | 12857.575 [385.7;40990.0] | 0.199 |
| Information correlation 1                                 | -0.082 [-0.12;-0.03]       | -0.082 [-0.11;0.05]          | -0.34        | 0.552             | -0.1% (0.0001)   | -22.2% (0.02)    | -0.063 [-0.12;-0.04]      | -0.067 [-0.12;0.06]       | 0.809 |
| Information correlation 2                                 | 0.603 [0.35;0.81]          | 0.672 [0.55;0.81]            | <b>0.44</b>  | 0.876             | +10.2% (0.07)    | -3.1% (-0.02)    | 0.56 [0.34;0.81]          | 0.579 [0.52;0.79]         | 0.855 |
| <b>Grey level run length based features (pyradiomics)</b> |                            |                              |              |                   |                  |                  |                           |                           |       |
| Short runs emphasis                                       | 0.913 [0.9;0.94]           | 0.94 [0.93;0.96]             | <b>0.70</b>  | 0.074             | +2.8% (0.03)     | +3.4% (0.03)     | 0.912 [0.87;0.93]         | 0.902 [0.89;0.93]         | 0.295 |
| Long runs emphasis                                        | 1.433 [1.25;1.54]          | 1.288 [1.17;1.31]            | <b>-0.68</b> | 0.079             | -11.2% (-0.1)    | -13.4% (-0.2)    | 1.455 [1.38;1.70]         | 1.559 [1.38;1.55]         | 0.143 |
| Low grey level run emphasis                               | 0.002 [0.001;0.003]        | 0.001 [0.0006;0.0011]        | <b>-0.98</b> | <b>&lt; 0.001</b> | -128.1% (-0.001) | -100.9% (-0.001) | 0.002 [0.002;0.003]       | 0.0025 [0.0023;0.0028]    | 0.560 |
| High grey level run emphasis                              | 667.425 [399.4;852.9]      | 1466.873 [1019.9;1746.6]     | <b>1.00</b>  | <b>&lt; 0.001</b> | +54.5% (799.4)   | +59.2% (867.7)   | 695.531 [336.9;568.2]     | 615.382 [369.0;518.0]     | 0.398 |
| Short run low grey level emphasis                         | 0.002 [0.001;0.002]        | 0.001 [0.0006;0.001]         | <b>-0.97</b> | <b>&lt; 0.001</b> | -120.3% (-0.001) | -92.0% (-0.001)  | 0.002 [0.002;0.003]       | 0.0022 [0.0021;0.0025]    | 0.810 |
| Short run high grey level emphasis                        | 619.305 [364.1;801.7]      | 1388.529 [914.0;1674.4]      | <b>0.99</b>  | <b>&lt; 0.001</b> | +55.4% (769.2)   | +60.7% (845.6)   | 649.568 [290.0;517.9]     | 567.209 [330.2;484.1]     | 0.371 |

|                                                          |                              |                               |              |                   |                  |                  |                              |                              |           |
|----------------------------------------------------------|------------------------------|-------------------------------|--------------|-------------------|------------------|------------------|------------------------------|------------------------------|-----------|
| Long run low grey level emphasis                         | 0.003<br>[0.002;0.004]       | 0.001<br>[0.0007;0.0014]      | <b>-0.98</b> | <b>&lt; 0.001</b> | -159.7% (-0.002) | -128.1% (-0.001) | 0.003 [0.003;0.005]          | 0.004 [0.003;0.004]          | 0.21<br>2 |
| Long run high grey level emphasis                        | 901.439<br>[592.8;1073.9]    | 1836.455<br>[1372.4;2279.3]   | <b>0.98</b>  | <b>&lt; 0.001</b> | +50.9% (935.0)   | +51.6% (936.4)   | 919.992 [562.2;775.3]        | 870.743<br>[585.4;846.7]     | 0.93<br>0 |
| Grey level non-uniformity                                | 956.211<br>[336.2;1225.0]    | 704.603<br>[381.9;955.1]      | 0.15         | 0.280             | -35.7% (-251.6)  | +2.4% (16.2)     | 653.726 [361.3;1550.0]       | 809.671<br>[677.97;1493.35]  | 0.76<br>1 |
| Normalized grey level non-uniformity                     | 0.153<br>[0.07;0.21]         | 0.091 [0.05;0.11]             | <b>-0.68</b> | 0.275             | -67.9% (-0.06)   | -81.0% (-0.05)   | 0.159 [0.09;0.25]            | 0.148 [0.09;0.18]            | 0.70<br>9 |
| Run length non-uniformity                                | 9934.876<br>[1985.4;16236.5] | 11323.826<br>[3832.5;13270.7] | <b>0.43</b>  | 0.768             | +12.3% (1388.9)  | +25.7% (2089.1)  | 4484.976<br>[1837.8;14936.2] | 5145.396<br>[3103.6;11700.0] | 0.62<br>7 |
| Normalized run length non-uniformity                     | 0.801<br>[0.77;0.86]         | 0.857 [0.83;0.91]             | <b>0.71</b>  | 0.062             | +6.5% (0.06)     | +8.0% (0.06)     | 0.799 [0.71;0.82]            | 0.783 [0.75;0.83]            | 0.37<br>1 |
| Run percentage                                           | 0.887<br>[0.86;0.93]         | 0.92 [0.91;0.95]              | <b>0.70</b>  | 0.064             | +3.6% (0.03)     | +4.7% (0.04)     | 0.886 [0.82;0.90]            | 0.871 [0.86;0.90]            | 0.26<br>8 |
| Grey level variance                                      | 37.036<br>[2.57;41.6]        | 57.474<br>[10.18;85.9]        | <b>0.64</b>  | 0.739             | +35.6% (20.4)    | +68.1% (21.6)    | 21.545 [1.72;31.39]          | 14.805 [4.26;28.78]          | 0.29<br>7 |
| Run length variance                                      | 0.152<br>[0.09;0.19]         | 0.101 [0.06;0.11]             | <b>-0.65</b> | 0.074             | -50.3% (-0.1)    | -43.4% (-0.04)   | 0.161 [0.14;0.24]            | 0.205 [0.13;0.19]            | 0.11<br>4 |
| Run entropy                                              | 3.917<br>[3.0;4.77]          | 4.455 [3.85;5.08]             | <b>0.62</b>  | 0.412             | +12.1% (0.5)     | +11.7% (0.5)     | 3.765 [2.88;4.56]            | 3.847 [3.31;4.39]            | 0.70<br>6 |
| <b>Grey level size zone based features (pyradiomics)</b> |                              |                               |              |                   |                  |                  |                              |                              |           |
| Small zone emphasis                                      | 0.497<br>[0.43;0.59]         | 0.561 [0.49;0.66]             | <b>0.57</b>  | 0.355             | +11.5% (0.1)     | +14.4% (0.1)     | 0.506 [0.39;0.55]            | 0.49 [0.36;0.50]             | 0.63<br>4 |
| Large zone emphasis                                      | 434.516<br>[26.2;246.0]      | 65.513<br>[9.48;59.2]         | <b>-0.59</b> | 0.332             | -563.2% (-369.0) | -264.8% (-55.5)  | 562.738 [62.62;820.51]       | 732.286<br>[88.41;541.77]    | 0.55<br>4 |
| Low grey level emphasis                                  | 0.002<br>[0.001;0.003]       | 0.001<br>[0.0006;0.0011]      | <b>-0.98</b> | <b>&lt; 0.001</b> | -124.4% (-0.001) | -90.5% (-0.001)  | 0.002 [0.002;0.003]          | 0.002 [.002;0.003]           | 0.48<br>4 |
| High grey level emphasis                                 | 723.418<br>[409.8;862.4]     | 1511.306<br>[997.0;1871.2]    | <b>0.98</b>  | <b>&lt; 0.001</b> | +52.1% (787.9)   | +59.5% (934.4)   | 695.486 [371.4;632.8]        | 611.782<br>[397.9;624.6]     | 0.33<br>6 |
| Small zone low grey level emphasis                       | 0.001<br>[0.0007;0.001]      | 0.005<br>[0.004;0.005]        | <b>-0.83</b> | <b>&lt; 0.001</b> | -97.1% (-0.0004) | -89.8% (-0.0004) | 0.001 [0.0008;0.001]         | 0.001 [0.0009;0.001]         | 0.73<br>8 |

|                                                                       |                                  |                                |              |                   |                    |                   |                                  |                                  |       |
|-----------------------------------------------------------------------|----------------------------------|--------------------------------|--------------|-------------------|--------------------|-------------------|----------------------------------|----------------------------------|-------|
| Small zone high grey level emphasis                                   | 393.079<br>[190.3;480.5]         | 898.586<br>[480.12;1262.8]     | <b>0.92</b>  | <b>&lt; 0.001</b> | +56.3% (505.5)     | +64.7% (571.0)    | 384.247 [146.5;349.6]            | 314.195 [127.2;295.8]            | 0.329 |
| Large zone low grey level emphasis                                    | 1.427<br>[0.04;0.66]             | 0.068<br>[0.006;0.07]          | <b>-0.74</b> | 0.386             | -2013.2% (-1.4)    | -651.6% (-0.1)    | 1.782 [0.17;2.32]                | 2.368 [0.26;1.63]                | 0.534 |
| Large zone high grey level emphasis                                   | 166847.021<br>[17237.6;108724.8] | 75776.413<br>[16704.0;50415.7] | -0.30        | 0.565             | -120.2% (-91070.6) | -89.0% (-18096.7) | 188712.486<br>[32518.0;276018.1] | 243079.958<br>[30860.9;251122.8] | 0.570 |
| Grey level non-uniformity                                             | 13.607<br>[6.62;23.5]            | 17.948<br>[9.99;23.96]         | <b>0.50</b>  | 0.904             | +24.2% (4.3)       | +23.5% (3.1)      | 9.602 [3.57;16.77]               | 12.464 [4.55;14.70]              | 0.855 |
| Grey level non-uniformity normalized                                  | 0.142<br>[0.05;0.20]             | 0.086 [0.04;0.11]              | <b>-0.63</b> | 0.320             | -64.6% (-0.06)     | -65.5% (-0.04)    | 0.159 [0.06;0.20]                | 0.178 [0.06;0.16]                | 0.418 |
| Zone size non-uniformity                                              | 89.604<br>[4.23;142.2]           | 173.591<br>[25.1;165.4]        | <b>0.62</b>  | 0.519             | +48.4% (84.0)      | +66.1% (59.8)     | 41.145 [2.24;64.34]              | 40.857 [4.03;47.4]               | 0.748 |
| Zone size non-uniformity normalized                                   | 0.281<br>[0.21;0.34]             | 0.317 [0.24;0.41]              | <b>0.47</b>  | 0.422             | +11.4% (0.03)      | +23.1% (0.1)      | 0.273 [0.19;0.32]                | 0.253 [0.18;0.27]                | 0.203 |
| Zone percentage                                                       | 0.238<br>[0.13;0.31]             | 0.355 [0.24;0.51]              | <b>0.66</b>  | <b>0.031</b>      | +33.0% (0.1)       | +4.5% (0.2)       | 0.251 [0.08;0.24]                | 0.215 [0.08;0.21]                | 0.413 |
| Grey level variance                                                   | 43.334<br>[3.93;52.85]           | 59.313<br>[10.82;86.9]         | <b>0.60</b>  | 0.925             | +26.9% (16.0)      | +58.2% (21.6)     | 21.936 [2.82;34.05]              | 15.709 [5.40;32.15]              | 0.270 |
| Zone size variance                                                    | 373.77<br>[16.2;188.4]           | 46.277<br>[5.14;41.2]          | <b>-0.54</b> | 0.339             | -707.7% (-327.5)   | -241.8% (34.1)    | 470.34 [45.59;600.47]            | 626.375<br>[57.7;447.14]         | 0.639 |
| Zone size entropy                                                     | 5.082<br>[4.01;6.42]             | 5.774 [5.28;6.47]              | <b>0.56</b>  | 0.546             | +12.0% (0.7)       | +10.5% (0.6)      | 4.742 [3.75;6.31]                | 4.784 [4.28;6.20]                | 0.630 |
| <b>Neighborhood grey tone difference based features (pyradiomics)</b> |                                  |                                |              |                   |                    |                   |                                  |                                  |       |
| Coarseness                                                            | 0.045<br>[0.005;0.023]           | 0.014<br>[0.006;0.015]         | -0.39        | 0.507             | -233.0% (-0.03)    | -41.1% (-0.004)   | 0.026 [0.005;0.02]               | 0.016 [0.006;0.014]              | 0.670 |
| Contrast                                                              | 0.155<br>[0.08;0.18]             | 0.234 [0.13;0.33]              | <b>0.64</b>  | <b>0.047</b>      | +33.7% (0.08)      | +46.3% (0.1)      | 0.211 [0.08;0.17]                | 0.165 [0.09;0.17]                | 0.537 |
| Busyness                                                              | 0.315<br>[0.17;0.35]             | 0.185 [0.10;0.28]              | <b>-0.47</b> | 0.057             | -70.7% (-0.1)      | -57.3% (-0.1)     | 0.351 [0.28;0.45]                | 0.448 [0.34;0.60]                | 0.608 |
| Complexity                                                            | 1125.952<br>[30.4;1092.6]        | 1890.278<br>[170.5;2466.2]     | <b>0.65</b>  | 0.760             | +40.4% (764.3)     | +63.7% (383.0)    | 595.748 [15.3;668.5]             | 337.923 [48.5;617.9]             | 0.303 |
| Strength                                                              | 4.277<br>[0.76;4.81]             | 5.666 [1.40;9.81]              | <b>0.53</b>  | 0.671             | +24.5% (1.4)       | +35.4% (1.3)      | 2.788 [0.58;3.03]                | 1.934 [0.67;3.14]                | 0.202 |

| <b>Neighboring grey level dependence based on features (pyradiomics)</b> |                               |                                |              |                   |                  |                  |                             |                              |           |
|--------------------------------------------------------------------------|-------------------------------|--------------------------------|--------------|-------------------|------------------|------------------|-----------------------------|------------------------------|-----------|
| Low dependence emphasis                                                  | 0.203<br>[0.12;0.27]          | 0.3 [0.21;0.43]                | <b>0.69</b>  | <b>0.030</b>      | +32.6% (0.1)     | +41.0% (0.1)     | 0.216 [0.08;0.21]           | 0.19 [0.09;0.20]             | 0.48<br>3 |
| High dependence emphasis                                                 | 20.758<br>[10.6;26.0]         | 13.169<br>[6.94;13.53]         | <b>-0.65</b> | 0.123             | -57.6% (-7.6)    | -89.5% (-8.7)    | 22.058 [17.1;33.0]          | 28.105 [16.51;26.27]         | 0.15<br>0 |
| Low grey level count emphasis                                            | 0.002<br>[0.001;0.003]        | 0.001<br>[0.0006;0.001]        | <b>-0.98</b> | <b>&lt; 0.001</b> | -128.2% (-0.001) | -101.8% (-0.001) | 0.002 [0.002;0.003]         | 0.0025<br>[0.0023;0.0028]    | 0.57<br>1 |
| High grey level count emphasis                                           | 664.558<br>[392.8;856.2]      | 1464.499<br>[1022.6;1740.3]    | <b>1.00</b>  | <b>&lt; 0.001</b> | +54.6% (799.9)   | +59.3% (870.0)   | 696.485 [337.0;545.3]       | 616.463<br>[368.3;511.8]     | 0.40<br>8 |
| Low dependence low grey level emphasis                                   | 0.0004<br>[0.0003;0.0005]     | 0.0002<br>[0.0001;0.0003]      | -0.38        | <b>0.002</b>      | -46.7% (-0.001)  | -42.0% (-0.0001) | 0.0003 [0.002;0.0004]       | 0.0003<br>[0.0003;0.004]     | 0.61<br>3 |
| Low dependence high grey level emphasis                                  | 171.444<br>[48.5;220.6]       | 504.486<br>[202.4;766.2]       | <b>0.90</b>  | <b>&lt; 0.001</b> | +66.0% (333.0)   | +72.6% (328.8)   | 201.906 [25.73;129.63]      | 148.213 [36.6;123.9]         | 0.37<br>8 |
| High dependence low grey level emphasis                                  | 0.051<br>[0.02;0.06]          | 0.013<br>[0.004;0.15]          | <b>-0.89</b> | <b>0.010</b>      | -288.0% (-0.04)  | -300.3% (-0.03)  | 0.061 [0.04;0.10]           | 0.079 [0.04;0.08]            | 0.17<br>0 |
| High dependence high grey level emphasis                                 | 10909.861<br>[7907.2;12181.3] | 16808.059<br>[10054.8;15042.0] | 0.33         | <b>0.008</b>      | +35.1% (5898.2)  | +1.2% (0.6)      | 10389.6<br>[7652.3;12187.6] | 12358.47<br>[6639.9;11179.6] | 0.13<br>1 |
| Grey level non-uniformity                                                | 86.107<br>[29.5;106.3]        | 59.77 [33.9;80.6]              | 0.10         | 0.265             | -44.1% (-26.3)   | +1.2% (0.7)      | 60.982 [32.88;136.04]       | 77.792 [64.8;130.5]          | 0.82<br>8 |
| Dependence count non-uniformity                                          | 178.905<br>[35.2;278.7]       | 245.986<br>[72.1;270.6]        | <b>0.50</b>  | 0.893             | +27.3% (67.1)    | +35.2% (61.4)    | 89.502 [32.03;240.87]       | 97.189 [54.7;205.1]          | 0.67<br>0 |
| Dependence count non-uniformity normalized                               | 0.181<br>[0.13;0.21]          | 0.219 [0.19;0.26]              | <b>0.59</b>  | 0.065             | +17.5% (0.04)    | +17.8% (0.03)    | 0.194 [0.13;0.20]           | 0.172 [0.14;0.18]            | 0.39<br>8 |
| Grey level variance                                                      | 36.56<br>[2.59;41.04]         | 57.37<br>[10.17;85.80]         | <b>0.64</b>  | 0.721             | +36.3% (20.8)    | +68.7% (21.8)    | 21.602 [1.66;31.03]         | 14.827 [4.22;27.93]          | 0.30<br>4 |
| Dependence count variance                                                | 4.004<br>[2.12;5.70]          | 2.78 [1.50;2.79]               | <b>-0.50</b> | 0.203             | -44.0% (-1.2)    | -45.6% (-1.0)    | 3.931 [2.58;6.36]           | 5.264 [3.13;4.95]            | 0.16<br>6 |
| Dependence count entropy                                                 | 5.668<br>[4.91;6.69]          | 6.191 [5.60;6.62]              | <b>0.53</b>  | 0.642             | +8.4% (0.5)      | +7.3% (0.5)      | 5.484 [4.81;6.61]           | 5.695 [5.35;6.34]            | 0.91<br>1 |

*p-value for the predictive value of carbidopa premedication in a linear regression model also including the histo-molecular diagnosis without and with Tumor to normal Brain ratios (TBR) (in bold. significant p-values). Absolute correlation coefficients in bold are  $\geq 0.4$ . TTP: Time to Peak; SUV: Standardized Uptake Value*

Table S2–S4: please see the excel files





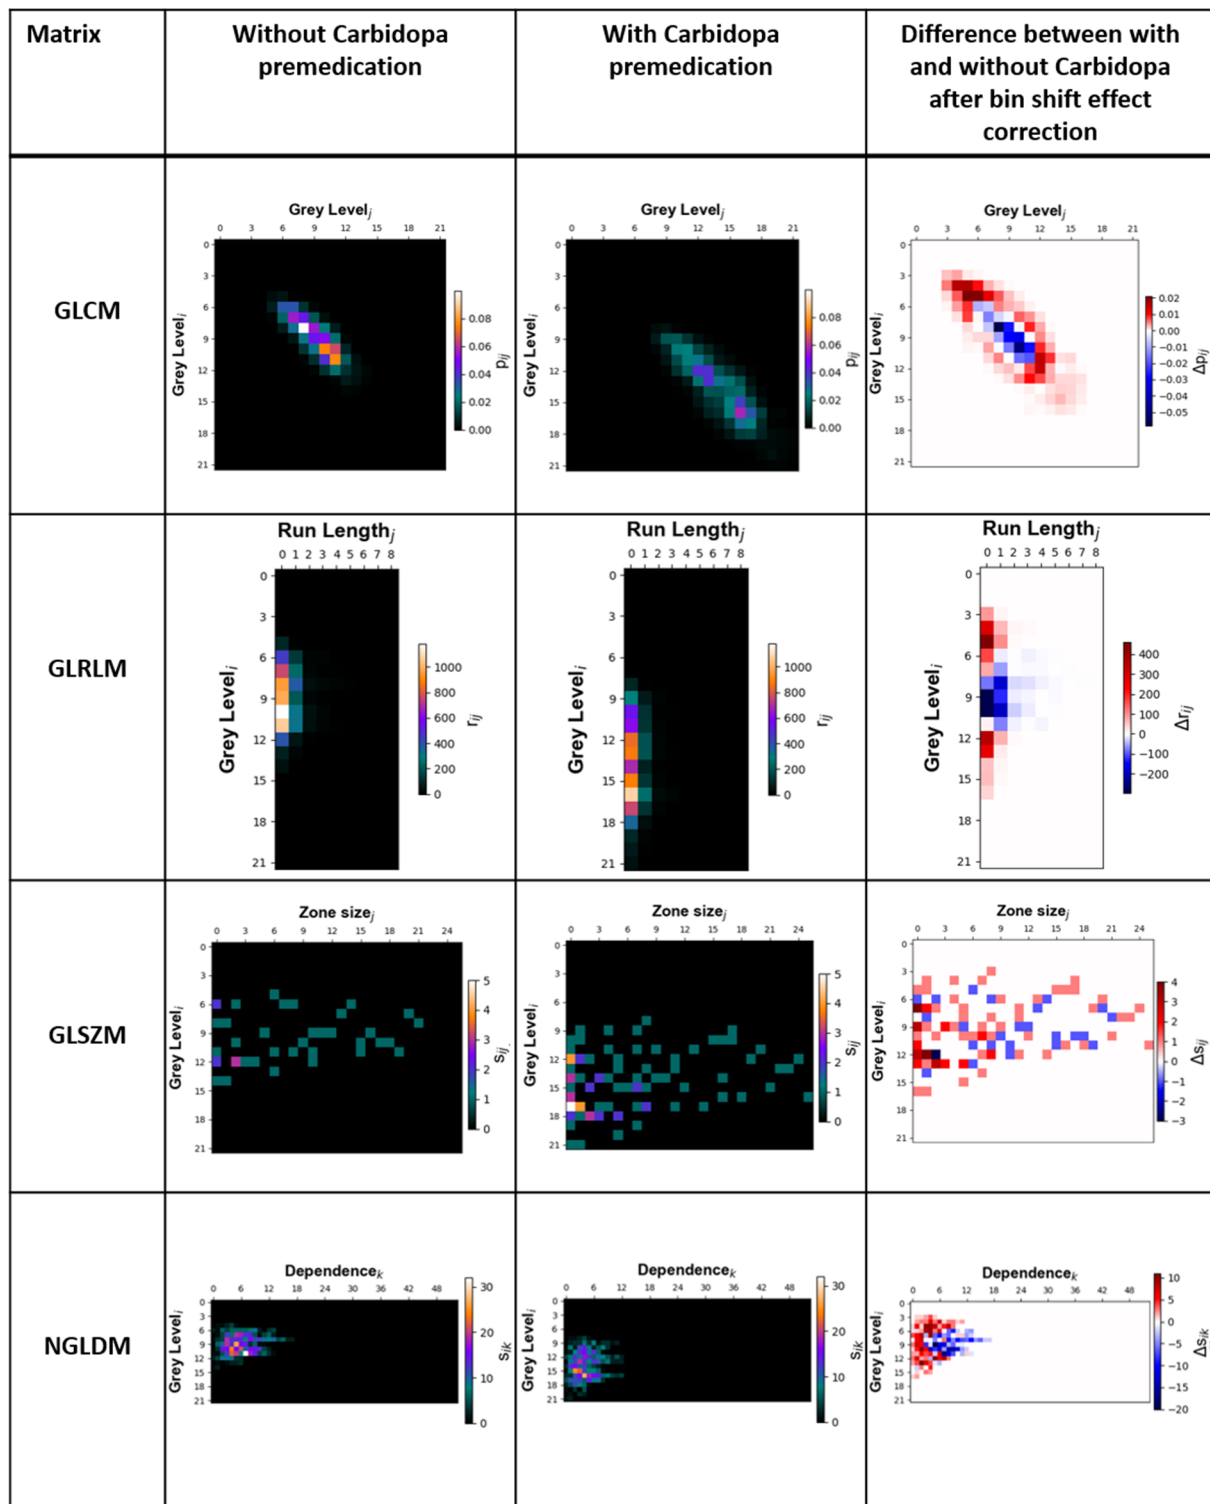

**Figure S2.** Illustration of bin spread effect on matrices in which some textural features were significantly modified with carbidoa, but poorly correlated to SUVmean. These four textural matrices are: 1. Grey level co-occurrence matrix (GLCM) with modified parameters: Inverse difference normalized, Inverse variance; 2. Grey level run length matrix (GLRLM) with modified parameter: Grey level non-uniformity; 3. Grey level size zone matrix (GLSZM) with modified parameters: Small zone emphasis, Zone size non-uniformity normalized; 4. Neighboring grey level dependence based matrix (NGLDM) with modified parameters: Dependence count non-uniformity normalized, and Dependence count variance. These textural matrices were extracted from a static healthy brain image of a patient without carbidoa

premedication and a similar static image was then generated to simulate the effect of carbidopa premedication. This simulation was performed by multiplying by 1.5 the voxel-values in the original static image (to reproduce the 50% increase in patients, reported in our current study). To emphasize the bin spread effect of carbidopa premedication on these matrices, the differences between carbidopa premedication and no premedication were computed after correcting matrices for the bin shift (linked to the increase of SUV values).  $p_{ij}$  represent the joint probability for the combination of grey levels  $i$  and  $j$  in neighboring voxels of Cancers 2021, 13, x FOR PEER REVIEW 8 of 8 the image.  $r_{ij}$  correspond to the joint probability of the number of runs with grey level  $i$  and length  $j$  in the image.  $s_{ij}$  represent the number of zones with gray level  $i$  and size  $j$  appearing in the image.  $s_{ik}$  is the joint probability for a voxel with grey level  $i$  and with  $k$  dependent on voxels appearing in the image.
